# Supplementary material
Source: PubMed Central journal article supplement (PMC5291041)
Supplement: supp_pp.16.01634_PP2016-01634DR3_Supplemental_Material.pdf [file supp_pp.16.01634_PP2016-01634DR3_Supplemental_Material.pdf]

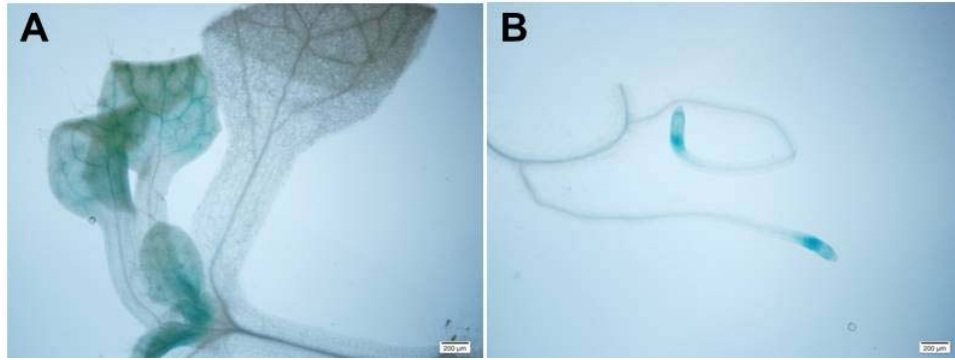

1

2 **Supplemental Fig. S1.** Representative GUS staining of *pMYB89:GUS*  
3 transgenic plants shows MYB89 expression in true leaves **(A)** and a root tip **(B)**  
4 of a 15-day-old young seedling. Bar = 200 µm.

5

6

7

8

9

10

11

12

13

14

15

16

17

18

19

20

21

22

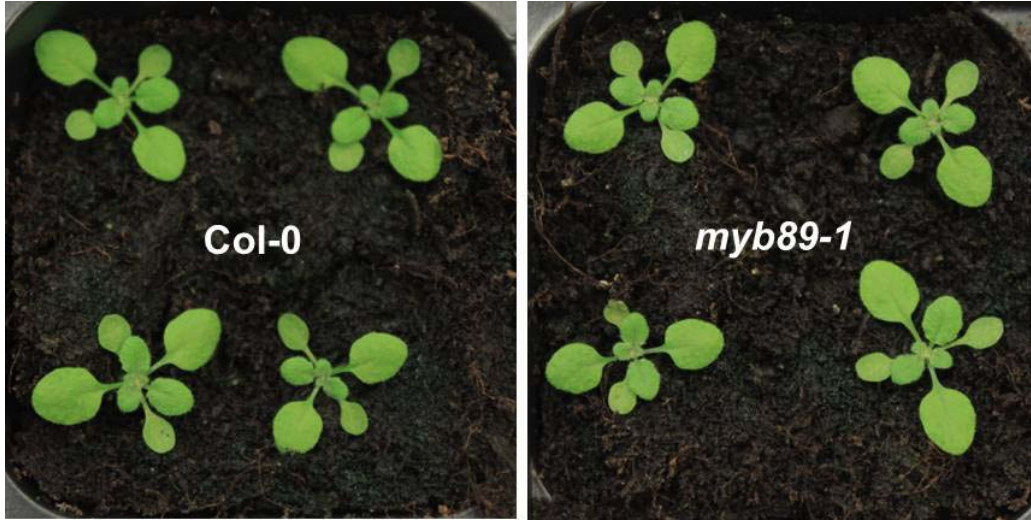

23

24 **Supplemental Fig. S2.** Comparison of the plant size between the wild-type  
25 (Col-0) and *myb89-1* plants. The photographs were taken 23 days after sowing  
26 under the same controlled conditions.

27

28

29

30

31

32

33

34

35

36

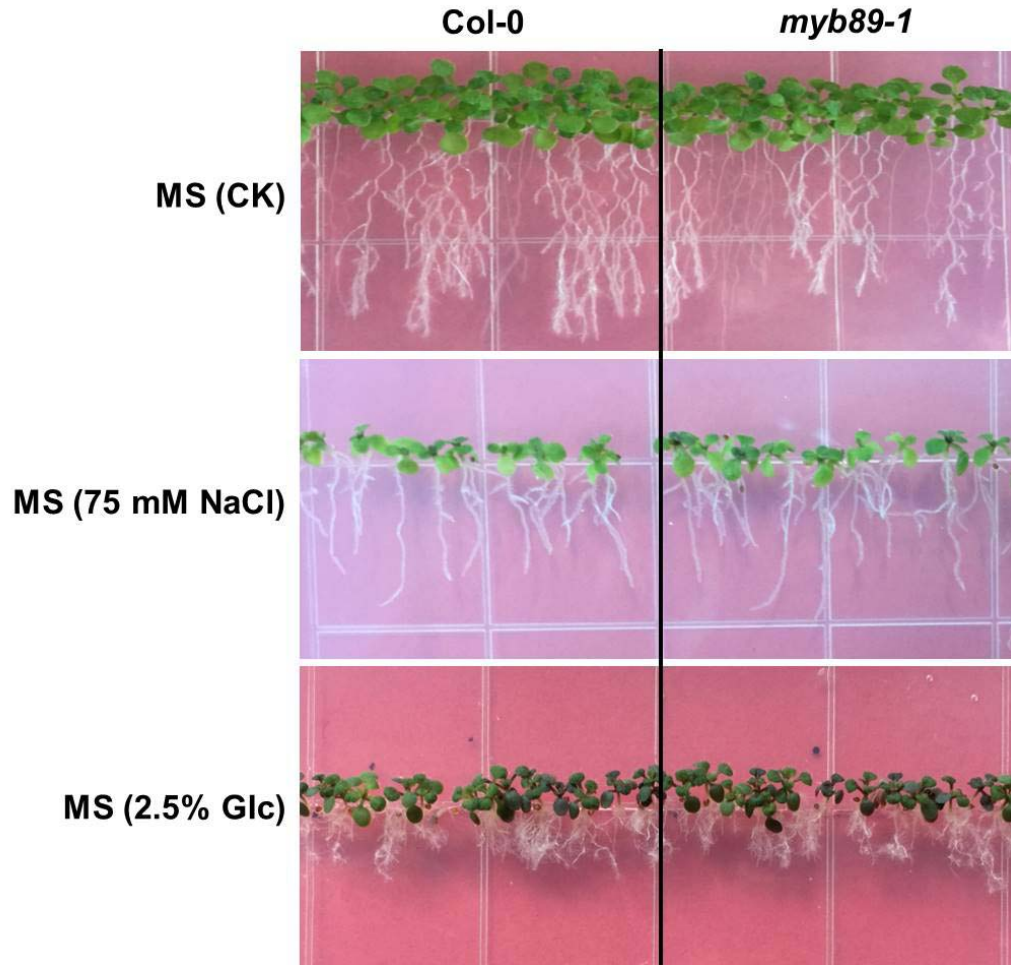

37

38 **Supplemental Fig. S3.** Comparison of the wild-type (Col-0) and *myb89-1*  
39 young seedlings under stressed environments. The photographs were taken  
40 20 days after sowing and show the situations on the control medium (without  
41 stress, CK), MS agar medium containing 2.5% (w/v) Glucose (Glc), and MS  
42 agar medium containing 75 mM NaCl.

43

44

45

46

47

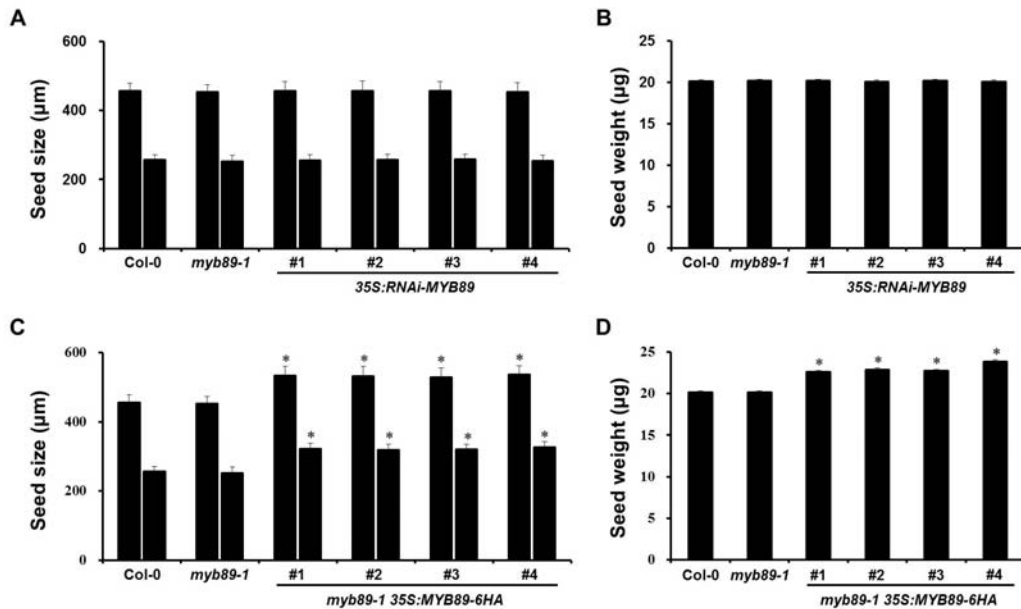

48

49 **Supplemental Fig. S4.** Effect of *MYB89* knockdown in the wild-type (Col-0)  
 50 background and *MYB89* overexpression in *myb89-1* mutant background on  
 51 seed size and seed weight. For each construct (*35S:RNAi-MYB89* and  
 52 *35S:MYB89-6HA*), four independent homozygous T3 transgenic lines with the  
 53 strongest effect on *MYB89* expression were selected and analysed. Values are  
 54 means  $\pm$  SD (n = 5), and each of the three assays for each biological replicate  
 55 contains 200 seeds from 12 individual plants grown in different pots arranged  
 56 randomly within one of the three blocks. Asterisks indicate significant  
 57 differences in the seed total FA content compared to that in the wild-type  
 58 (ANOVA, Tukey's test,  $P \leq 0.05$ ).

59 **(A)** Quantitative comparison of seed size [length (Left column) and width  
 60 (Right column)] between the wild-type (Col-0) and *35S:RNAi-MYB89*  
 61 transgenic plants.

62 **(B)** Quantitative comparisons of seed dry weight between the wild-type (Col-0)  
 63 and *35S:RNAi-MYB89* transgenic plants.

64 **(C)** Quantitative comparison of seed size [length (Left column) and width  
 65 (Right column)] between the wild-type (Col-0) and *myb89-1 35S:MYB89-6HA*  
 66 transgenic plants.

67 **(D)** Quantitative comparisons of seed dry weight between the wild-type (Col-0)  
 68 and *myb89-1 35S:MYB89-6HA* transgenic plants.

69  
 70

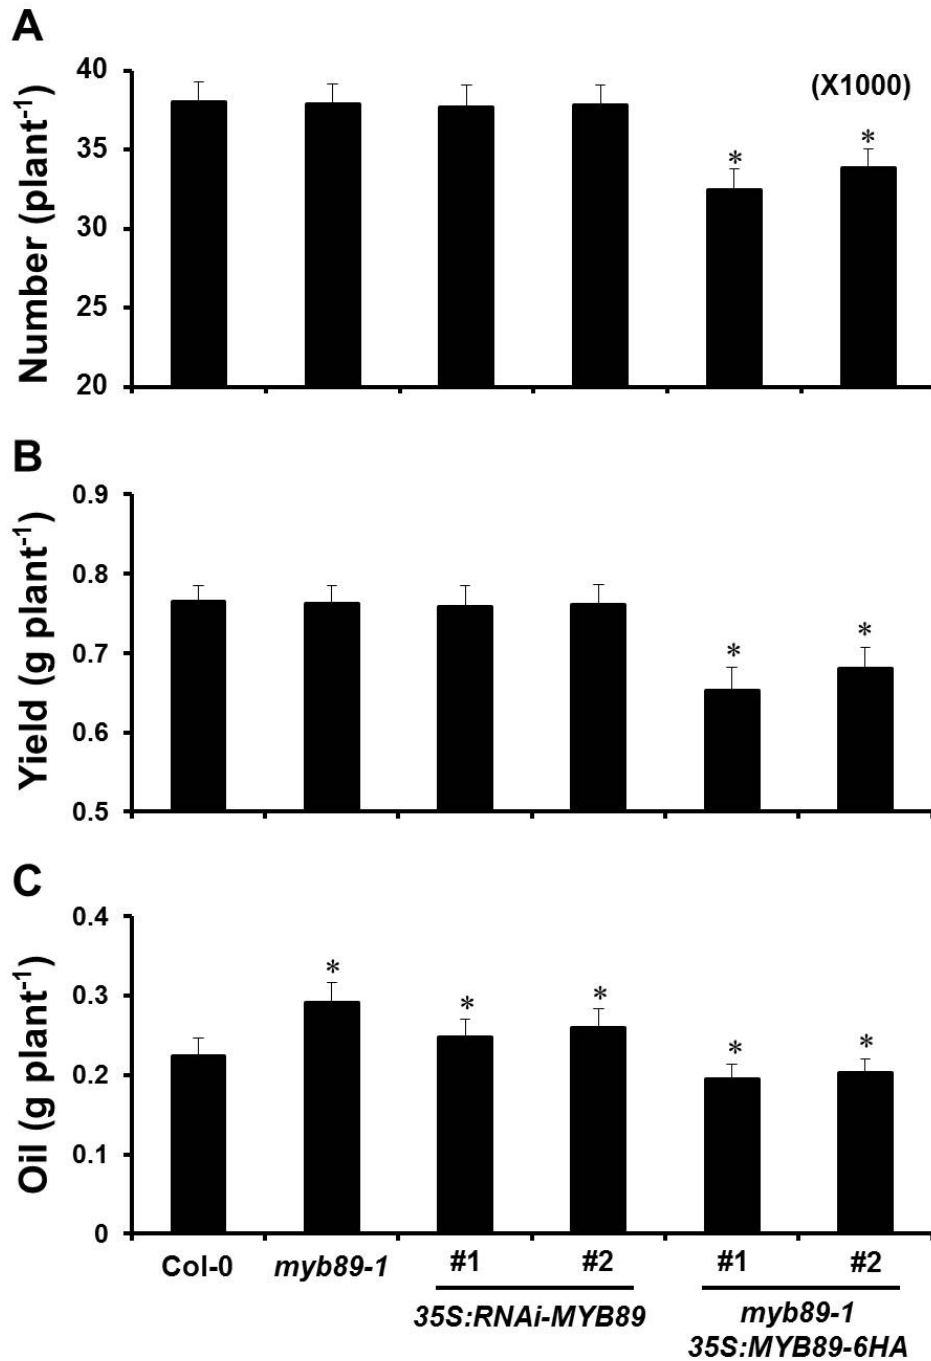

71

72 **Supplemental Fig. S5.** Effect of altering *MYB89* expression on seed number  
 73 (A), seed yield (B), and oil yield (C). Values are means  $\pm$  SD of measurements  
 74 on seeds from individual plants ( $n = 12$ ) of each genotype grown under the  
 75 same controlled conditions. Asterisks indicate significant differences compared  
 76 to the wild-type (two-tailed paired Student's *t* test,  $P \leq 0.05$ ).

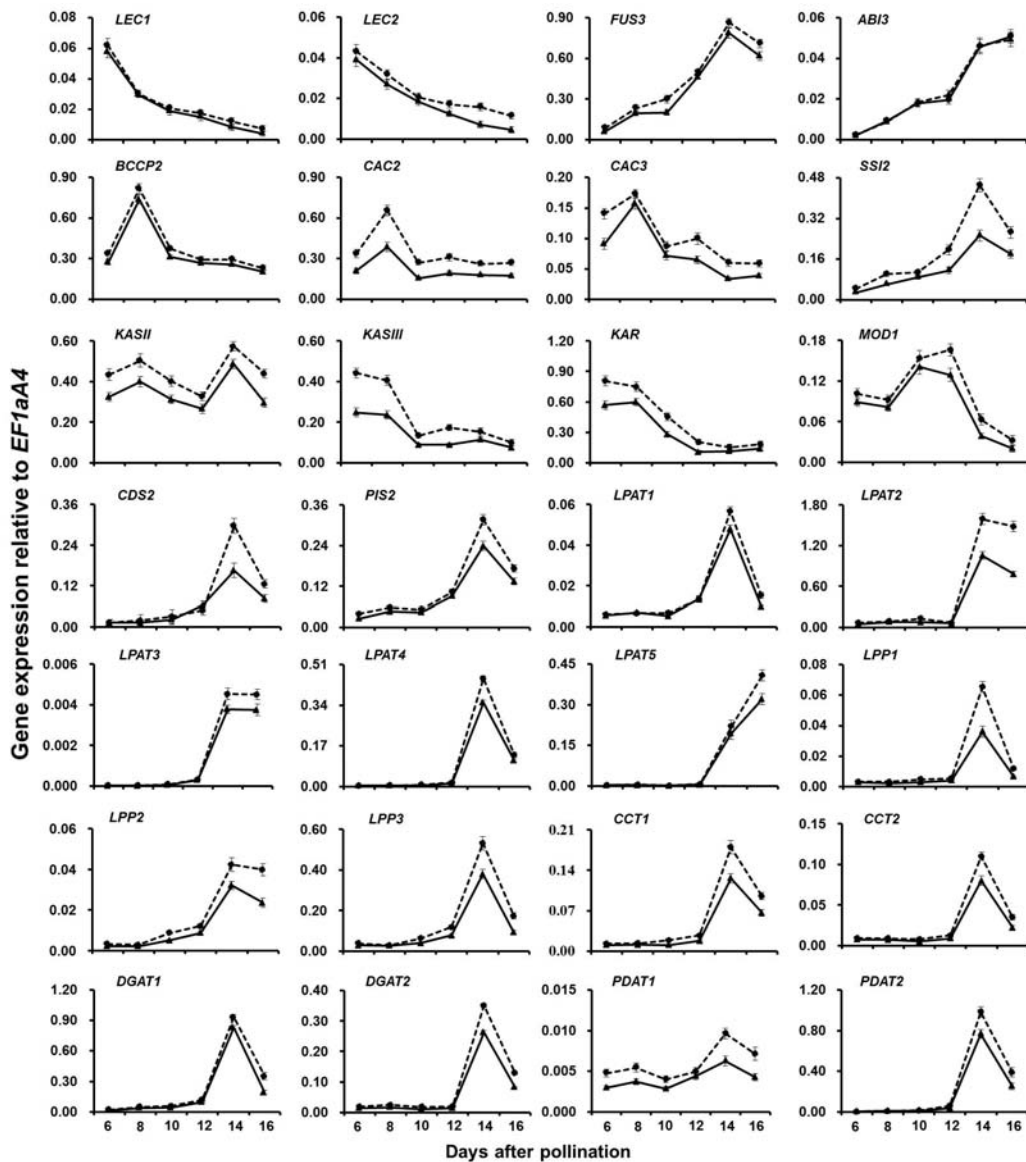

77

78 **Supplemental Fig. S6.** qRT-PCR analysis of the expression of genes involved  
 79 in FA biosynthesis and TAG deposition in developing seeds of the wild-type  
 80 (Col-0) and *myb89-1* plants. Solid and dotted lines indicate the dynamic  
 81 expression of genes in the wild-type and *myb89-1* plants, respectively. Results  
 82 were normalised against the expression levels of *EF1aA4* as an internal  
 83 control. Values are means  $\pm$  SD (n = 3). No significant differences in  
 84 expression levels of these genes in *myb89-1* compared with those in the  
 85 wild-type plants were observed (two-tailed paired Student's *t* test,  $P \leq 0.05$ ).

86

87

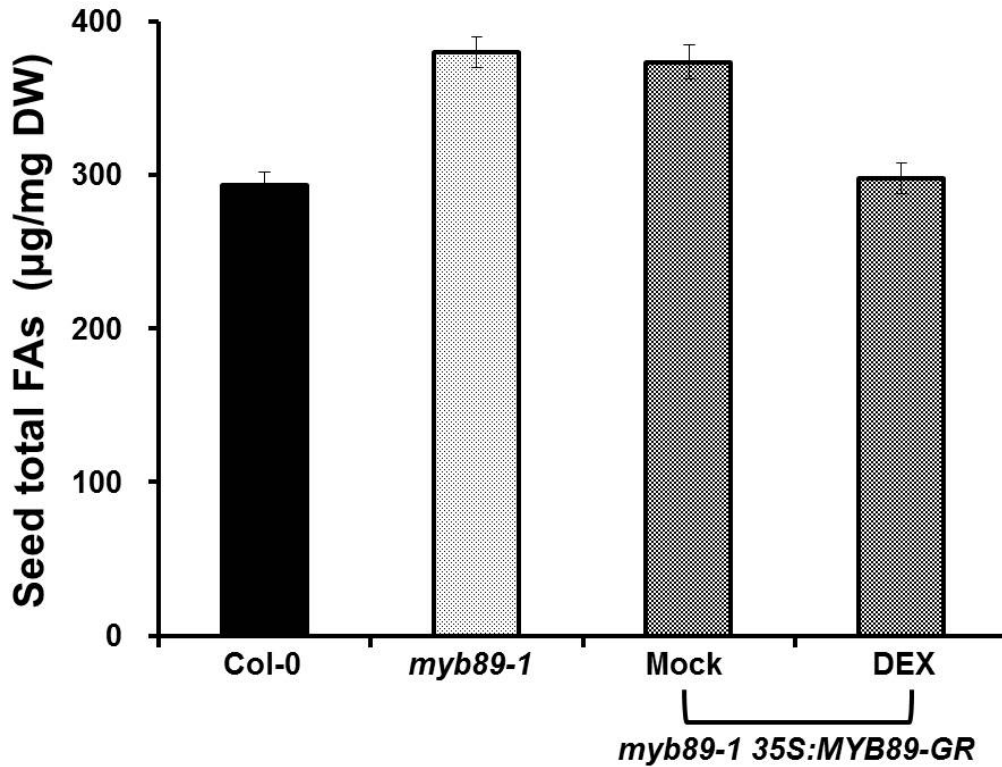

88

89 **Supplemental Fig. S7.** Confirmation of the biologically active MYB89-GR  
90 fusion. Seedlings of *myb89-1 35S:MYB89-GR* were mock-treated (Mock) or  
91 treated with 10 µM dexamethasone (Dex) every alternate day after  
92 germination. The seed FA content of mock-treated plants was similar to that of  
93 *myb89-1* plants, whereas dexamethasone treatment rescues this phenotype to  
94 the wild-type (Col-0) level. Values are means ± SD (n = 5).

95

96

97

98

99

100

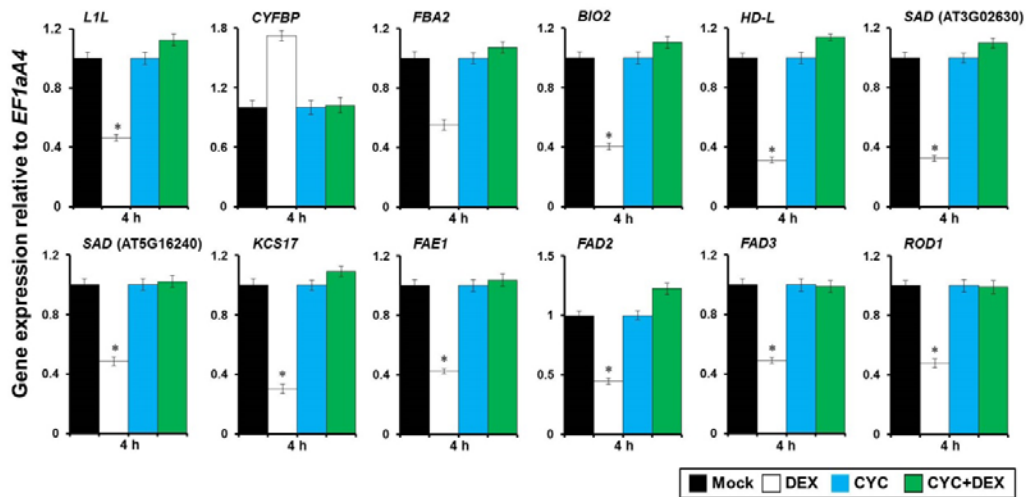

101

102 **Supplemental Fig. S8.** The genes involved in glycolysis, FA biosynthesis and  
 103 modification, and TAG deposition in developing seeds are not immediate  
 104 targets of transcriptional regulation by MYB89 in developing seeds. The  
 105 *myb89-1 35S:MYB89-GR* siliques at 12 DAP were mock-treated (Mock) or  
 106 treated with 10  $\mu$ M dexamethasone (DEX), 10  $\mu$ M cycloheximide (CYC), or 10  
 107  $\mu$ M CYC plus 10  $\mu$ M DEX (DEX + CYC), and siliques at 14 DAP were used for  
 108 the transcriptional analysis of *FAD2*, *FAD3*, *FAE1*, and *ROD1*. The expression  
 109 of these genes was examined after 4 h of treatment by qRT-PCR analyses.  
 110 Results were normalised against the expression of *EF1aA4* as an internal  
 111 control. Values are means  $\pm$  SD (n = 3). Asterisks indicate significant  
 112 differences in gene expression in dexamethasone-treated samples compared  
 113 with their respective controls (two-tailed paired Student's *t* test,  $P \leq 0.05$ ).

114

115

116

117

118

119

120

121

122



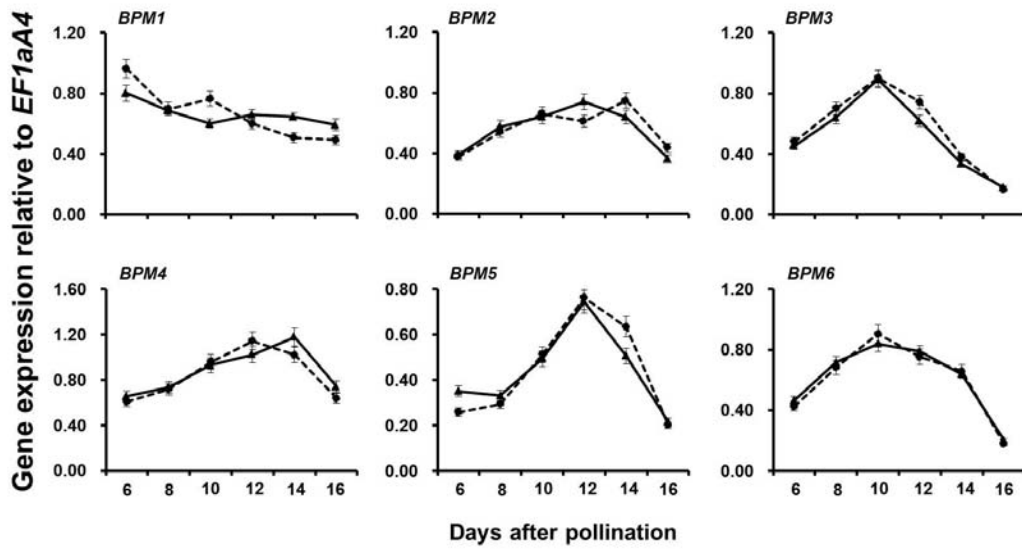

123

124 **Supplemental Fig. S9.** qRT-PCR analysis of the expression of six *BPM* genes  
 125 in developing seeds of the wild-type (*Col-0*) and *myb89-1* plants. Solid and  
 126 dotted lines indicate the dynamic expression of genes in the wild-type and  
 127 *myb89-1* plants, respectively. Results were normalised against the expression  
 128 levels of *EF1aA4* as an internal control. Values are means  $\pm$  SD ( $n = 3$ ). No  
 129 significant differences in expression levels of these genes in *myb89-1*  
 130 compared with those in the wild-type plants were observed (two-tailed paired  
 131 Student's *t* test,  $P \leq 0.05$ ).

132
